# Supplementary material for: Study protocol of a 52-week Prospective Running INjury study in Gothenburg (SPRING)
Source: PubMed Central journal article supplement — BMJ Open Sport Exerc Med. 2018 Jun 26;4(1):e000394. doi: 10.1136/bmjsem-2018-000394 (PMC6045728; doi:10.1136/bmjsem-2018-000394), 2018-06-26

# Training diary

Calendar week

1

ID-number

0 0 1

| Day                                                  |                                  | Monday | Tuesday | Wednesday | Thursday | Friday  | Saturday | Sunday |
|------------------------------------------------------|----------------------------------|--------|---------|-----------|----------|---------|----------|--------|
| Distance in km                                       |                                  |        | 18      |           |          | 3,7     |          |        |
| Time in minutes                                      |                                  |        | 110     |           |          | 15      |          |        |
| Type of training (Legend 1)                          |                                  |        | 2       |           |          | 3       |          |        |
| Shoes (Brand)                                        |                                  |        | Nike    |           |          | Asics   |          |        |
| Shoes (Model)                                        |                                  |        | Pegasus |           |          | Noosa 8 |          |        |
| Intensity RPE (Legend 2)                             |                                  |        | 14      |           |          | 18      |          |        |
| Surface (in percent)                                 | hard - streets / asphalt         |        |         |           |          |         |          |        |
|                                                      | hard - treadmill                 |        |         |           |          |         |          |        |
|                                                      | hard - tartan                    |        |         |           |          | 100     |          |        |
|                                                      | medium - gravel (crushed stones) |        | 50      |           |          |         |          |        |
|                                                      | medium - gravel (fine)           |        |         |           |          |         |          |        |
|                                                      | soft - grass                     |        |         |           |          |         |          |        |
|                                                      | soft - forest soil               |        | 50      |           |          |         |          |        |
|                                                      | other: specify                   |        |         |           |          |         |          |        |
|                                                      | Flat                             |        | 60      |           |          | 100     |          |        |
|                                                      | Uphill                           |        | 20      |           |          |         |          |        |
| Downhill                                             |                                  | 20     |         |           |          |         |          |        |
| Before training                                      | <b>Stretching (yes / no)</b>     |        | no      |           |          | yes     |          |        |
|                                                      | Quadriceps (thigh)               |        |         |           |          | x       |          |        |
|                                                      | Hamstrings                       |        |         |           |          | x       |          |        |
|                                                      | Thigh outside                    |        |         |           |          | x       |          |        |
|                                                      | Thigh inside                     |        |         |           |          | x       |          |        |
|                                                      | Calf                             |        |         |           |          |         |          |        |
|                                                      | Other: specify                   |        |         |           |          |         |          |        |
|                                                      | Total time in minutes            |        |         |           |          | 2       |          |        |
| After training                                       | <b>Stretching (yes / no)</b>     |        | yes     |           |          | yes     |          |        |
|                                                      | Quadriceps (thigh)               |        | x       |           |          | x       |          |        |
|                                                      | Hamstrings                       |        | x       |           |          | x       |          |        |
|                                                      | Thigh outside                    |        |         |           |          | x       |          |        |
|                                                      | Thigh inside                     |        |         |           |          | x       |          |        |
|                                                      | Calf                             |        |         |           |          | x       |          |        |
|                                                      | Other: specify                   |        |         |           |          |         |          |        |
|                                                      | Total time in minutes            |        | 1       |           |          | 5       |          |        |
| Have you felt any pain due to the training? (yes/no) |                                  |        | no      |           |          | yes     |          |        |
| If yes, how much? (legend 3)                         |                                  |        |         |           |          | 4       |          |        |
| Was your training affected by the pain? (yes/ no)    |                                  |        |         |           |          | no      |          |        |
| Pain location                                        | Frontside knee                   |        |         |           |          |         |          |        |
|                                                      | Backside knee                    |        |         |           |          |         |          |        |
|                                                      | Shank                            |        |         |           |          |         |          |        |
|                                                      | Achilles tendon                  |        |         |           |          | x       |          |        |
|                                                      | Foot                             |        |         |           |          |         |          |        |
|                                                      | Other                            |        |         |           |          |         |          |        |
| When?                                                | Before training                  |        |         |           |          |         |          |        |
|                                                      | Only during training             |        |         |           |          |         |          |        |
|                                                      | During and after training        |        |         |           |          |         |          |        |
|                                                      | Only after training              |        |         |           |          | x       |          |        |

## Total training this week

1

Kilometers: 21,7 km

Time 125 min

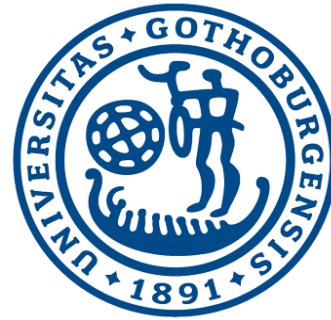

### Other physical training/exercise

|    |                   |      |    |     |
|----|-------------------|------|----|-----|
| 1. | Spinning          | Time | 45 | min |
| 2. | Strength training | Time | 45 | min |
| 3. |                   | Time |    | min |
| 4. |                   | Time |    | min |
| 5. |                   | Time |    | min |

### Comments (about pain, new shoes, sickness etc).

#### Legend 1

Type of training

- 1 slow running / recovery training
- 2 medium fast running
- 3 fast running
- 4 interval session
- 5 competition

#### Legend 2

Intensity

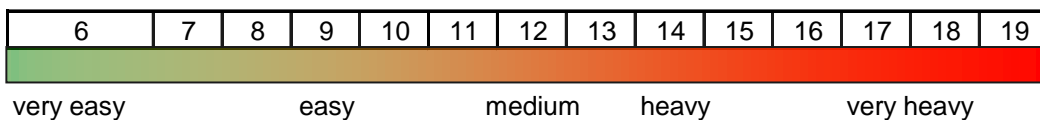

#### Legend 3

How much pain?

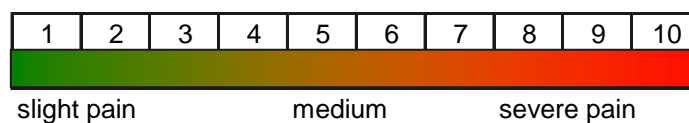

Supplement: bmjsem-2018-000394supp001.pdf [file bmjsem-2018-000394supp001.pdf]
