# Supplementary material for: Study protocol of a 52-week Prospective Running INjury study in Gothenburg (SPRING)
Source: PubMed Central journal article supplement — BMJ Open Sport Exerc Med. 2018 Jun 26;4(1):e000394. doi: 10.1136/bmjsem-2018-000394 (PMC6045728; doi:10.1136/bmjsem-2018-000394), 2018-06-26
Supplement: bmjsem-2018-000394supp002.pdf [file bmjsem-2018-000394supp002.pdf]

# Training questionnaire

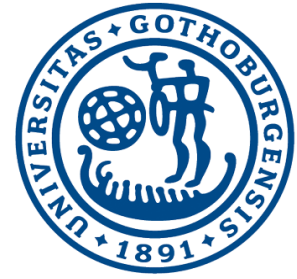

How many years have you been practicing running?  years

Average weekly distance (previous 12 months)  kilometers

Number of sessions per week

ID number

Time spent on running per week  minutes

Average running speed  min/km

Surface (percent)  hard (asphalt, tartan, treadmill)  
 medium (gravel)  
 soft (grass, forest soil)

## Personal best

10km   
 Half marathon   
 Marathon

## Number of competitions

10km   
 Half marathon   
 Marathon

## Training

2 days ago (y/n)  Pain?   
 If yes: specify type of activity

1 day ago (y/n)  Pain?   
 If yes: specify type of activity

## Shoes

|                    |                      |    |                      |     |                      |
|--------------------|----------------------|----|----------------------|-----|----------------------|
| #1 Brand and model | <input type="text"/> | km | <input type="text"/> | age | <input type="text"/> |
| #2 Brand and model | <input type="text"/> | km | <input type="text"/> | age | <input type="text"/> |
| #3 Brand and model | <input type="text"/> | km | <input type="text"/> | age | <input type="text"/> |
| #4 Brand and model | <input type="text"/> | km | <input type="text"/> | age | <input type="text"/> |
| #5 Brand and model | <input type="text"/> | km | <input type="text"/> | age | <input type="text"/> |

## Other physical training

|                     |                      |           |                      |          |                      |
|---------------------|----------------------|-----------|----------------------|----------|----------------------|
| #1 Type of activity | <input type="text"/> | frequency | <input type="text"/> | duration | <input type="text"/> |
| #2 Type of activity | <input type="text"/> | frequency | <input type="text"/> | duration | <input type="text"/> |
| #3 Type of activity | <input type="text"/> | frequency | <input type="text"/> | duration | <input type="text"/> |
