# Supplementary material for: Study protocol of a 52-week Prospective Running INjury study in Gothenburg (SPRING)
Source: PubMed Central journal article supplement — BMJ Open Sport Exerc Med. 2018 Jun 26;4(1):e000394. doi: 10.1136/bmjsem-2018-000394 (PMC6045728; doi:10.1136/bmjsem-2018-000394), 2018-06-26
Supplement: bmjsem-2018-000394supp003.pdf [file bmjsem-2018-000394supp003.pdf]

# DEPARTMENT OF FOOD AND NUTRITION, AND SPORT SCIENCE

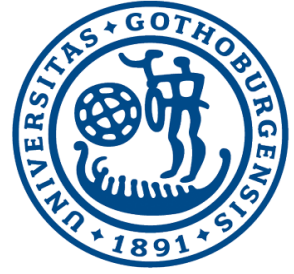

Name:

Swedish social security number (yy-mm-dd-xxxx):

Mobile phone:

Study ID number:

**Describe current status, pain history and injury occurrence:**

**Diagnosis:**

**Treatment:**

---

Signature medical practitioner

Date (yy-mm-dd)
