# Supplementary material for: Study protocol of a 52-week Prospective Running INjury study in Gothenburg (SPRING)
Source: PubMed Central journal article supplement — BMJ Open Sport Exerc Med. 2018 Jun 26;4(1):e000394. doi: 10.1136/bmjsem-2018-000394 (PMC6045728; doi:10.1136/bmjsem-2018-000394), 2018-06-26
Supplement: bmjsem-2018-000394supp004.pdf [file bmjsem-2018-000394supp004.pdf]

# GENERAL INFORMATION

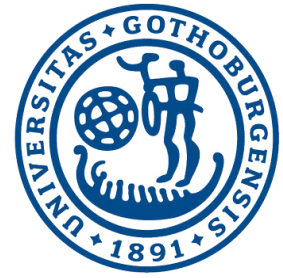

Date of examination

Name

Study ID

email adress

postal adress

street

code

city

Male

Female

Date of birth

Age

Height  cm

Weight  kg

## Past Injuries

Injury #1  when?

Injury #1  when?

Injury #3  when?

**Further remarks**

# RANGE OF MOTION

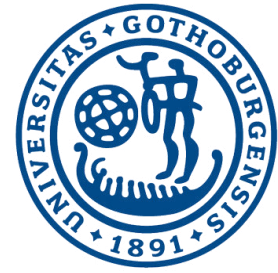

## HIP

|           | Norm    | LEFT                     |                          |                          | RIGHT                    |                          |                          |
|-----------|---------|--------------------------|--------------------------|--------------------------|--------------------------|--------------------------|--------------------------|
|           |         | hypo                     | norm                     | hyper                    | hypo                     | norm                     | hyper                    |
| Flexion   | 130/140 | <input type="checkbox"/> |
| Extension | 20/30   | <input type="checkbox"/> |
| Abduction | 30/50   | <input type="checkbox"/> |
| Adduction | 20/30   | <input type="checkbox"/> |
| IR        | 30/45   | <input type="checkbox"/> |
| ER        | 40/50   | <input type="checkbox"/> |

## KNEE

|           | Norm    | LEFT                     |                          |                          | RIGHT                    |                          |                          |
|-----------|---------|--------------------------|--------------------------|--------------------------|--------------------------|--------------------------|--------------------------|
|           |         | hypo                     | norm                     | hyper                    | hypo                     | norm                     | hyper                    |
| Flexion   | 120/150 | <input type="checkbox"/> |
| Extension | 5/10    | <input type="checkbox"/> |

## ANKLE

|             | Norm  | LEFT                     |                          |                          | RIGHT                    |                          |                          |
|-------------|-------|--------------------------|--------------------------|--------------------------|--------------------------|--------------------------|--------------------------|
|             |       | hypo                     | norm                     | hyper                    | hypo                     | norm                     | hyper                    |
| Dorsiflex   | 20/30 | <input type="checkbox"/> |
| Plantarflex | 40/50 | <input type="checkbox"/> |
| Pronation   | 15    | <input type="checkbox"/> |
| Supination  | 35    | <input type="checkbox"/> |

**Further remarks**



# MOVEMENT PATTERNS - KINEMATICS

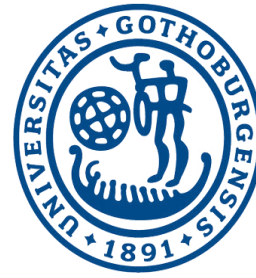

Footwear Brand \_\_\_\_\_

Model \_\_\_\_\_

Age: \_\_\_\_\_ km \_\_\_\_\_ years

neutral     supported     minimalist

| Running Protocol | BF                       | Shod                     | BF | Shod                     | BF                       | Shod |                          |
|------------------|--------------------------|--------------------------|----|--------------------------|--------------------------|------|--------------------------|
| 1                | <input type="checkbox"/> | <input type="checkbox"/> | 21 | <input type="checkbox"/> | <input type="checkbox"/> | 41   | <input type="checkbox"/> |
| 2                | <input type="checkbox"/> | <input type="checkbox"/> | 22 | <input type="checkbox"/> | <input type="checkbox"/> | 42   | <input type="checkbox"/> |
| 3                | <input type="checkbox"/> | <input type="checkbox"/> | 23 | <input type="checkbox"/> | <input type="checkbox"/> | 43   | <input type="checkbox"/> |
| 4                | <input type="checkbox"/> | <input type="checkbox"/> | 24 | <input type="checkbox"/> | <input type="checkbox"/> | 44   | <input type="checkbox"/> |
| 5                | <input type="checkbox"/> | <input type="checkbox"/> | 25 | <input type="checkbox"/> | <input type="checkbox"/> | 45   | <input type="checkbox"/> |
| 6                | <input type="checkbox"/> | <input type="checkbox"/> | 26 | <input type="checkbox"/> | <input type="checkbox"/> | 46   | <input type="checkbox"/> |
| 7                | <input type="checkbox"/> | <input type="checkbox"/> | 27 | <input type="checkbox"/> | <input type="checkbox"/> | 47   | <input type="checkbox"/> |
| 8                | <input type="checkbox"/> | <input type="checkbox"/> | 28 | <input type="checkbox"/> | <input type="checkbox"/> | 48   | <input type="checkbox"/> |
| 9                | <input type="checkbox"/> | <input type="checkbox"/> | 29 | <input type="checkbox"/> | <input type="checkbox"/> | 49   | <input type="checkbox"/> |
| 10               | <input type="checkbox"/> | <input type="checkbox"/> | 30 | <input type="checkbox"/> | <input type="checkbox"/> | 50   | <input type="checkbox"/> |
| 11               | <input type="checkbox"/> | <input type="checkbox"/> | 31 | <input type="checkbox"/> | <input type="checkbox"/> | 51   | <input type="checkbox"/> |
| 12               | <input type="checkbox"/> | <input type="checkbox"/> | 32 | <input type="checkbox"/> | <input type="checkbox"/> | 52   | <input type="checkbox"/> |
| 13               | <input type="checkbox"/> | <input type="checkbox"/> | 33 | <input type="checkbox"/> | <input type="checkbox"/> | 53   | <input type="checkbox"/> |
| 14               | <input type="checkbox"/> | <input type="checkbox"/> | 34 | <input type="checkbox"/> | <input type="checkbox"/> | 54   | <input type="checkbox"/> |
| 15               | <input type="checkbox"/> | <input type="checkbox"/> | 35 | <input type="checkbox"/> | <input type="checkbox"/> | 55   | <input type="checkbox"/> |
| 16               | <input type="checkbox"/> | <input type="checkbox"/> | 36 | <input type="checkbox"/> | <input type="checkbox"/> | 56   | <input type="checkbox"/> |
| 17               | <input type="checkbox"/> | <input type="checkbox"/> | 37 | <input type="checkbox"/> | <input type="checkbox"/> | 57   | <input type="checkbox"/> |
| 18               | <input type="checkbox"/> | <input type="checkbox"/> | 38 | <input type="checkbox"/> | <input type="checkbox"/> | 58   | <input type="checkbox"/> |
| 19               | <input type="checkbox"/> | <input type="checkbox"/> | 39 | <input type="checkbox"/> | <input type="checkbox"/> | 59   | <input type="checkbox"/> |
| 20               | <input type="checkbox"/> | <input type="checkbox"/> | 40 | <input type="checkbox"/> | <input type="checkbox"/> | 60   | <input type="checkbox"/> |

Strike  heel     midfoot     forefoot

**Further remarks**

# ISOMETRIC STRENGTH - DAVID

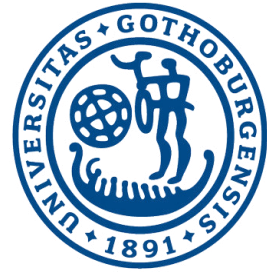

## KNEE

## STRENGTH

|            |                  |        |                      |    |             |
|------------|------------------|--------|----------------------|----|-------------|
| David F200 | <b>Extension</b> | right  | <input type="text"/> | Nm | Seat: ..... |
|            |                  | at 60° |                      |    |             |
|            |                  | left   | <input type="text"/> | Nm | Foot: ..... |
| David F300 | <b>Flexion</b>   | right  | <input type="text"/> | Nm | Seat: ..... |
|            |                  | at 30° |                      |    |             |
|            |                  | left   | <input type="text"/> | Nm | Foot: ..... |

## HIP

|            |                  |        |                      |    |
|------------|------------------|--------|----------------------|----|
| David F310 | <b>Abduction</b> |        | <input type="text"/> | Nm |
|            |                  | at 15° |                      |    |
| David F320 | <b>Adduction</b> |        | <input type="text"/> | Nm |
|            |                  | at 15° |                      |    |

## UPPER BODY

|            |                       |               |                      |             |             |
|------------|-----------------------|---------------|----------------------|-------------|-------------|
| David G110 | <b>Back Extension</b> |               | <input type="text"/> | Nm          | Seat: ..... |
|            |                       | at 30°        |                      |             |             |
|            |                       |               |                      | Head: ..... | Foot: ..... |
| David G130 | <b>Abd.Flexion</b>    |               | <input type="text"/> | Nm          | Seat: ..... |
|            |                       | at 0°         |                      |             |             |
|            |                       |               |                      |             | Foot: ..... |
| David G120 | <b>Rotation</b>       | right         | <input type="text"/> | Nm          | Seat: ..... |
|            |                       | at -30° / 30° |                      |             |             |
|            |                       | left          | <input type="text"/> | Nm          | Foot: ..... |
